1 **Title:** The evolution of parasite host range in genetically diverse host populations

2 **Running Title:** Host diversity and generalist parasites

3 **Authors:**

4 Amanda K Gibson<sup>1,2\*</sup>, Helena S Baffoe-Bonnie<sup>1</sup>, McKenna J Penley, Julie Lin<sup>1</sup>, Raythe Owens<sup>1</sup>,  
5 Arooj Khalid<sup>1</sup>, and Levi T. Morran<sup>1</sup>

6 **Affiliations:**

7 <sup>1</sup>Department of Biology, Emory University, Atlanta, GA 30322

8 <sup>2</sup>Department of Biology, University of Virginia, Virginia 22902, USA

9 **Corresponding author:** Amanda K Gibson, Department of Biology, University of Virginia,  
10 Virginia 22902, USA; [akg5nq@virginia.edu](mailto:akg5nq@virginia.edu)

11 **Author contributions:** AKG conceived and directed the study, performed experimental  
12 evolution and assays, collected data, analyzed data, and wrote the manuscript. HSBB assisted in  
13 experimental evolution, performed assays, collected and analyzed data, and contributed to drafts  
14 of the manuscript. MJP, JL, RO and AK assisted in experimental evolution and assays. LTM  
15 conceived the study, provided guidance, collected data, and revised the manuscript.

16 **Acknowledgements:** We are grateful to Dilys Osei for her contributions to experimental  
17 evolution. This work was supported in part by funds from the National Science Foundation  
18 (DEB-1750553) to LT Morran. AK Gibson was supported by the NIH IRACDA program  
19 Fellowships in Research and Science Teaching (FIRST) at Emory University (K12GM000680).  
20 Some strains were provided by the CGC, which is funded by the NIH Office of Research  
21 Infrastructure Programs (P40 OD0140440).

22

23

24

25

26 **Abstract:** Parasites vary enormously in their host range. Why are some parasites specialists and  
27 others generalists? We tested the hypothesis that genetically diverse host populations select for  
28 parasites with broader host ranges than genetically homogeneous host populations. To do so, we  
29 selected for increased killing ability of the bacterial parasite *Serratia marcescens* in populations  
30 of the host *Caenorhabditis elegans* that were either diverse (50% mix of genotypes N2 and  
31 LTM1) or homogenous (100% N2 or LTM1). We found mixed support for the hypothesis.  
32 After 20 generations of selection, parasites selected in diverse host populations maintained a  
33 broad host range, as shown by the retention of high killing ability of a novel host genotype.  
34 Parasites selected in diverse populations killed N2 hosts equally well as parasites selected in  
35 homogenous populations of N2. However, N2-selected parasites lost killing ability against the  
36 novel host, consistent with the evolution of narrow host ranges in homogenous environments. In  
37 contrast, parasites selected in homogenous LTM1 populations did not specialize: they did not  
38 increase in their killing ability on LTM1 and did not lose killing ability against the novel host.  
39 Our results argue that the evolution of host range depends upon both the identity and diversity of  
40 hosts that a parasite encounters.

41

42 **Keywords:** Host range, spatial variation, generalist, specialist, experimental evolution,  
43 *Caenorhabditis elegans*

44

45

46

47

## 48 **Introduction**

49 Closely-related parasites may vary in the number of host genotypes (Carius et al. 2001; Thrall et  
50 al. 2001; Poullain et al. 2008), species (Desdevises et al. 2002; Poulin and Mouillot 2003;  
51 Krasnov et al. 2004), or even families (Ross et al. 2013) they can attack. Why does host range  
52 vary so much? Here, we use experimental evolution to test the hypothesis that the variance of  
53 the host environment drives the evolution of parasite host range, such that genetically diverse  
54 host populations favor generalist parasites and genetically homogeneous host populations favor  
55 specialist parasites.

56 This hypothesis derives from theory on the evolution of niche width. This body of theory  
57 argues that heterogeneous environments select for large niche widths (i.e. generalists), while  
58 homogeneous environments select for narrow niche widths (i.e. specialists) (Levins 1962; Pianka  
59 1966; Via and Lande 1985; Lynch and Gabriel 1987; Futuyma and Moreno 1988).  
60 Specialization in a homogeneous environment is thought to arise from either antagonistic  
61 pleiotropy, where mutations that increase performance in the focal environment reduce  
62 performance in alternate environments (Rausher 1984; Jaenike 1990; Via 1990), or mutation  
63 accumulation, where populations accumulate mutations that are neutral in the focal environment  
64 and deleterious in alternate environments (Fry 1996; Whitlock 1996). The probability of fixation  
65 of such mutations declines if individuals have a high probability of encountering multiple  
66 environments, due to either temporal or fine-scale spatial heterogeneity. Experimental evolution  
67 studies of free-living systems support the maintenance of generalists under abiotic heterogeneity,  
68 notably under temporal heterogeneity (Bennett et al. 1992; Reboud and Bell 1997) (rev. in  
69 Kassen 2002).

70           This body of theory has been extended to the evolution of host range in parasites.  
71   Substantial evidence now exists for the evolution of host specialization under temporal  
72   homogeneity: during serial passage, many parasites adapt to infect individual host species or  
73   genotypes and simultaneously decline in their ability to infect alternate hosts (Cunfer 1984; Fry  
74   1990; Ebert 1998). In contrast, tests of the associated prediction, that diverse host environments  
75   select for generalist parasites, are few in number and limited to viral systems. A common  
76   approach involves creating temporal host heterogeneity by alternating a viral lineage between  
77   cell lines derived from different host species (Novella et al. 1999; Weaver et al. 1999; Coffey  
78   and Vignuzzi 2011) (though see Bedhomme et al. 2011). Turner et al. (2010) adopted this  
79   approach, finding mixed support for the idea that diverse host communities select for parasites  
80   that can infect a broad range of host species: after alternation between human and canine cells,  
81   populations of vesicular stomatitis virus populations showed higher performance on cell lines of  
82   novel host species relative to viral populations serially passaged on human cells. In contrast,  
83   viral populations serially passaged on canine cells showed no average reduction in performance  
84   relative to viral populations selected under temporal alternation. Studies have not explicitly  
85   tested if spatial variation in hosts favor parasites with broad host ranges.

86           We build on these studies by directly testing the hypothesis that genetically diverse host  
87   populations select for parasites with a broader range of host genotypes than genetically  
88   homogeneous host populations. To test this hypothesis, we used experimental evolution to select  
89   on populations of the bacterial parasite *Serratia marcescens* for increased performance in  
90   populations of the nematode host *Caenorhabditis elegans* that varied in their diversity. Some  
91   host populations were genetically diverse (an even mix of two genotypes), creating fine-scale  
92   spatial variation in the host environment. Others were genetically homogeneous (one of two

93 possible genotypes), creating spatial homogeneity. We then compared the breadth of host ranges  
94 across treatments by evaluating the performance of evolved parasite lineages on a novel host  
95 genotype. We predicted that 1) parasites selected in diverse host populations would maintain or  
96 increase in their ability to kill a novel host genotype, consistent with selection for a broad host  
97 range, and 2) parasites selected in homogeneous populations would show reduced killing ability  
98 of the novel host, consistent with specialization. We found mixed support for these predictions.

## 99 **Materials and Methods**

### 100 *Host and parasite genotypes*

101 For experimental evolution, we used two genotypes of the nematode *Caenorhabditis*  
102 *elegans*: N2 and LTM1. Slowinski et al. (2016) described the origins of the LTM1 line, which is  
103 a single genotype derived from ethylmethane sulfonate mutagenesis of the CB4856 genotype.  
104 We selected these two host genotypes for experimental evolution because 1) N2 and CB4856 are  
105 among the most genetically divergent genotypes within *C. elegans* (Barrière and Félix 2005),  
106 and 2) preliminary assays demonstrated that the parasite *Serratia marcescens* is equally virulent  
107 to N2 and LTM1.

108 For assays of parasite virulence, we also included the host genotype JU1395. JU1395 is  
109 roughly equally genetically divergent from N2 and LTM1 (Andersen et al. 2012). Hence we  
110 limited the potential that genetic proximity alone would generate differences between parasites  
111 adapted to N2 vs. LTM1 in their virulence against JU1395. Assays of parasite performance  
112 against JU1395 allowed us to compare the host range of evolved parasite lineages. We  
113 subsequently refer to JU1395 as a novel host genotype, because parasite lineages never  
114 encountered this host genotype during experimental evolution. We refer to N2 and LTM1 as

115 sympatric host genotypes, because parasite lineages encountered one or both of these host  
116 genotypes during experimental evolution.

117 We initiated replicate parasite lineages from Sm2170, a genotype of the bacterial parasite  
118 *Serratia marcescens*. Sm2170 is known to be highly virulent towards *C. elegans* hosts  
119 (Schulenburg and Ewbank 2004). The interaction of *C. elegans* and Sm2170 is a novel host-  
120 parasite interaction constructed in the lab: there is no evidence that *C. elegans* encounters this  
121 particular strain of *S. marcescens* in the wild, and Sm2170 had not previously been  
122 experimentally evolved with *C. elegans*. Hosts acquire infection while feeding.

### 123 *Parasite selection treatments*

124 We established four treatments, each with six replicate parasite lineages (Fig. 1). In three  
125 of these treatments, we subjected replicate parasite lineages to direct selection for increased  
126 virulence against host populations that differed in their level of genetic diversity. In the first two  
127 treatments, parasites were selected to kill hosts in homogeneous host populations. These host  
128 populations comprised either 100% N2 hosts or 100% LTM1 hosts. In the third treatment,  
129 parasites were selected to kill hosts in populations that were genetically diverse. These  
130 populations were 50% N2 and 50% LTM1 hosts. We assumed that parasites have no ability for  
131 host choice, such that parasites passaged with genetically diverse host populations had an equal  
132 probability of encountering an N2 or LTM1 host each generation of selection.

133 We did not allow for host evolution during experimental evolution. Hence, each passage,  
134 parasites were re-exposed to host populations of the same make-up as the prior generation. We  
135 limited host evolution by maintaining stock populations of N2 and LTM1 at 15°C. Every few  
136 weeks, we refreshed these stocks by thawing hosts archived at -80°C. Our experimental

137 treatments therefore limited temporal host heterogeneity in order to contrast spatial host  
138 heterogeneity with homogeneity.

139           The fourth treatment was the control treatment, where we did not directly select for  
140 increased virulence. We designed this treatment to serve as the baseline against which to  
141 measure evolutionary change in the prior three treatments. In this treatment, we passaged  
142 bacteria without hosts. In doing so, we subjected bacterial populations to genetic drift and to the  
143 non-focal selection pressures of the experiment in the absence of selection for increased  
144 virulence.

145

146

147

148

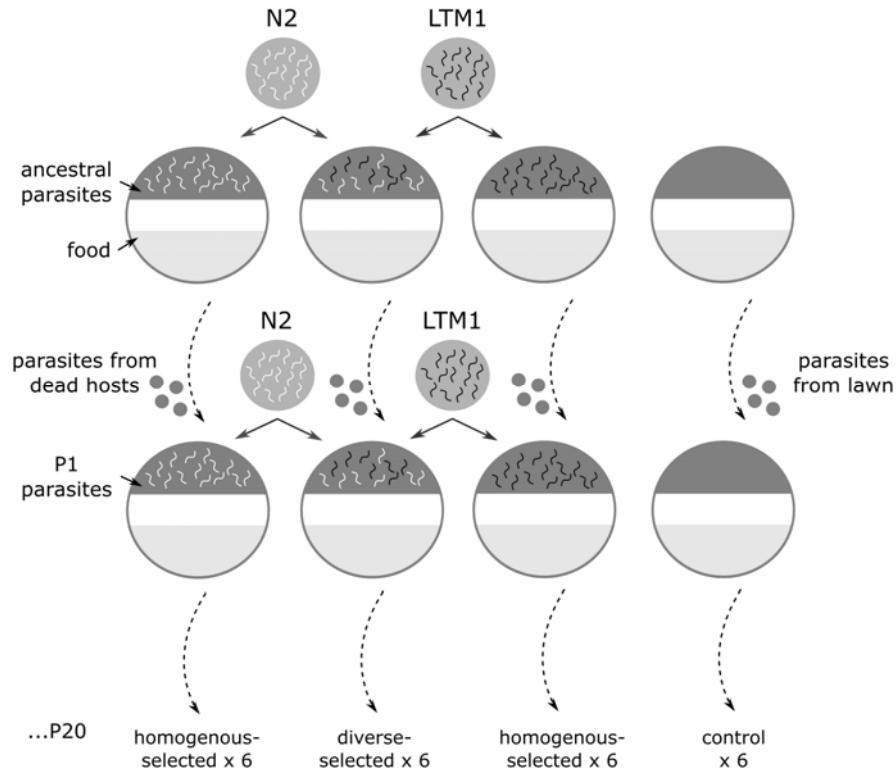

**Figure 1: Experimental evolution scheme.** We initiated experimental evolution by adding 500 *C. elegans* hosts to *Serratia* selection plates seeded with a lawn of Sm2170, the ancestral parasite genotype (dark lawn on upper portion of plates). For homogeneous selection, we added 100% N2 (left, white) or 100% LTM1 (right, black) hosts. For diverse selection, we added 50% N2 and 50% LTM1 hosts. We then selected for virulent parasites by extracting parasite colonies from hosts that died rapidly, within 24 hours. We used this passage of parasites (shown here as P1, second row) to seed lawns on *Serratia* selection plates, to which the same genotype(s) of hosts were added to commence the second round of selection. For the control treatment, we did not add any hosts and passaged parasite colonies directly from the lawn. We continued these selection regimes for a total of 20 passages. Each of the four treatments was replicated six times, for a total of 24 independent parasite lineages.

149

### 150 *Experimental evolution design*

151 Selection was performed using *Serratia* selection plates, as in Morran et al. (2009) (Fig.  
152 1). Under this design, we seeded 100 mm petri dishes of Nematode Growth Media (NGM-lite,  
153 United States Biological) with 35 uL of bacterial parasites (*Serratia marcescens*) on one side of  
154 the plate and 35 uL of food (*Escherichia coli*, strain OP50) on the other. Adding nematodes to the



155 *Serratia* lawn forced interaction between hosts and parasites. Hosts could then migrate towards  
156 the lawn of food. We used this particular design in order to maintain the conditions of prior  
157 evolution experiments (Morran et al. 2009; Morran et al. 2011; Slowinski et al. 2016) and  
158 thereby facilitate comparison with their results.

159 To initiate experimental evolution, we harvested large numbers of L4 larvae of N2 and  
160 LTM1 hosts. We established host populations that were 100% N2, 100% LTM1, or 50%  
161 N2:50% LTM1 hosts by mixing the appropriate volumes of larvae of each host genotype. All  
162 initial *Serratia* selection plates were seeded with the same culture of Sm2170. In order to  
163 establish six replicate parasite lineages per treatment, we deposited ~500 L4 larvae of the  
164 appropriate host population onto the Sm2170 lawns of six different *Serratia* selection plates. For  
165 the control treatment, we did not add any larvae to the Sm2170 lawns. This resulted in a total of  
166 24 plates representing 24 independent parasite lineages, six per each of four treatments.

167 We maintained these plates for 24 hours at 20°C. We then selected the most virulent  
168 parasites by isolating and transferring those that killed hosts rapidly, within 24 hours. To  
169 accomplish this, we picked 20-30 dead hosts from the Sm2170 lawn of each plate. We removed  
170 external bacteria from these hosts by repeated rinsing, then crushed the hosts to extract the  
171 internal bacteria that had killed them (Morran et al. 2011). We grew these bacteria on NGM-lite  
172 plates at room temperature (~22°C) for 48 hours, then maintained them at 4°C for 48 hours. We  
173 then randomly selected 40 colonies from these plates and grew them at 28°C overnight in 5 mL  
174 of LB media. These liquid cultures were used to produce the next round of *Serratia* selection  
175 plates, to which we added the same host population encountered by the parasite lineage in the  
176 prior passage.

177 For the control treatment, we collected ~30 samples of free-living bacteria directly from  
178 the lawn of *Serratia* in order to mimic the sample sizes obtained in the other treatments. We  
179 otherwise treated these populations in the same manner as the host-associated lineages. We  
180 repeated this passaging scheme for a total of 20 passages, at which point we froze liquid cultures  
181 of parasite lineages at -80°C.

### 182 *Survival assays of parasite virulence*

183 We measured parasite virulence as the mortality rate of a host genotype after 48 hours of  
184 exposure to a parasite lineage. In setting up the assays, we replicated the experimental passaging  
185 scheme. For each host genotype tested, we added a fixed volume of L4 larvae (100% focal host  
186 genotype) to multiple replicate *Serratia* selection plates of all 24 parasite lineages. We  
187 determined the mean number of L4 larvae added to *Serratia* selection plates by adding this same  
188 volume to 10 standard plates seeded with OP50 and counting the number of hosts after 24 hours.  
189 We maintained *Serratia* selection plates at 20°C for 48 hours, then counted the number of live  
190 worms that had migrated out of the *Serratia* lawn. The mortality rate was obtained from the  
191 survival rate, which we calculated as the number of live hosts divided by the mean number  
192 added.

193 For the N2 genotype, we added  $494 \pm 26$  hosts (mean  $\pm$  standard error of the mean) per  
194 *Serratia* selection plates. Each parasite lineage was replicated four times, for a total of 24  
195 experimental replicates per selection treatment. For the LTM1 genotype, we added  $498 \pm 25$   
196 hosts. Each parasite lineage was also replicated four times. For our novel genotype, JU1395, we  
197 added  $270 \pm 12$  hosts. Each parasite lineage was replicated eight times, for a total of 48  
198 experimental replicates per selection treatment.

199 *Statistical Analyses*

200 All statistical analyses were performed in R (ver. 3.5.3; R Core Team 2013). We  
201 conducted three separate analyses, one for each host genotype tested in the survival assays, in  
202 order to compare the virulence of parasite lineages from different experimental treatments  
203 towards a given host genotype. Statistical analyses with the N2 and LTM1 genotypes served to  
204 evaluate adaptation of parasite lineages to their sympatric host genotypes. The statistical analysis  
205 with the JU1395 genotype served to evaluate the host range of selected parasite lineages, by  
206 testing their ability to kill a novel host genotype.

207 We began with survival assay data for N2, one of the sympatric host genotypes. We fit a  
208 Poisson regression with experimental evolution treatment (control, homogeneous N2,  
209 homogeneous LTM1, diverse) as a predictor of the number of live worms in an experimental  
210 replicate. We included parasite lineage (1-6) as a random effect. We found evidence of  
211 significant overdispersion (variance inflation factor,  $\hat{c}=19.98$ )(Venables and Ripley 2002), so we  
212 re-fit the model as a negative binomial regression with the `glmer.nb` function in the `lme4` package  
213 (Bates et al. 2015). A likelihood ratio test indicated a substantially better fit with the negative  
214 binomial regression relative to the Poisson regression (Likelihood-ratio test:  $\chi^2=1319.2$ ,  $df=1$ ,  
215  $p<0.001$ ). We applied this same modeling approach for the LTM1 and JU1395 genotypes. In  
216 both cases, we found evidence of overdispersion (LTM1,  $\hat{c}=21.65$ ; JU1395,  $\hat{c}=11.63$ ) and a  
217 better fit to our data with a negative binomial regression (LTM1,  $\chi^2=1504.5$ ,  $df=1$ ,  $p<0.001$ ;  
218 JU1395,  $\chi^2=1448.1$ ,  $df=1$ ,  $p<0.001$ ).

219 We then evaluated treatment as a predictor of variation in the number of surviving hosts  
220 by using likelihood ratio tests to compare models with and without the treatment factor. For  
221 models in which treatment was a significant predictor of variation in survival, we examined

222 model coefficients to compare between treatments. In analysis of sympatric host genotypes, we  
223 tested the prediction that parasite lineages evolved increased virulence against hosts with which  
224 they were passaged during experimental evolution. In analysis of the novel host genotype, we  
225 tested the prediction that parasite lineages selected in diverse host populations would have higher  
226 virulence against a novel host than parasite lineages selected in homogeneous host populations,  
227 consistent with a larger host range for parasites selected in diverse host populations.

228 Lastly, we conducted a post-hoc analysis, based on observation of the data, to test if  
229 parasite lineages selected in diverse host populations varied less in their virulence against a novel  
230 host than parasite lineages selected in homogeneous host populations. To test this prediction, we  
231 calculated the coefficient of variation in virulence (both number of surviving hosts and mortality  
232 rate) against JU1395 across the six independent parasite lineages per treatment. We calculated  
233 95% confidence intervals for the coefficient of variation by bootstrapping the JU1395 data set  
234 10,000 times. Specifically, we re-sampled the experimental replicates per parasite lineage eight  
235 times with replacement and re-calculated the coefficient of variation for each treatment.

## 236 **Results**

### 237 *Adaptation to sympatric host genotypes*

238 We first evaluated the virulence of experimentally evolved parasites when paired with  
239 their sympatric hosts, N2 and LTM1. We predicted an increase in virulence when parasite  
240 lineages were paired with the host genotypes on which they were selected.

241 The mortality rate of N2 was 82.3% when paired with the ancestral parasite genotype.  
242 This closely matched the mortality rate of N2 when paired with control parasite lineages after 20  
243 experimental passages ( $82.6 \pm 0.8\%$  SEM) (Table S1). When paired with experimentally evolved

244 parasites, the mortality rate of N2 varied with parasite selection treatment (Table 1A, Fig. 2A).  
245 Consistent with our prediction, parasite lineages selected to kill hosts in populations that were  
246 diverse or homogeneous for N2 showed increased ability to kill N2 hosts relative to control  
247 parasites (Generalized linear mixed model, number of surviving worms relative to control: 50%:  
248 coefficient = -0.315,  $z = -2.287$ ,  $p = 0.022$ ; 100% N2: coefficient = -0.514,  $z = -3.677$ ,  $p < 0.001$ )  
249 and parasites selected to kill homogeneous LTM1 populations (50%: coefficient = 0.383,  $z =$   
250  $2.755$ ,  $p = 0.006$ ; 100% N2: coefficient = 0.582,  $z = 4.232$ ,  $p < 0.001$ ). Specifically, the  
251 mortality rate of N2 was  $87.3 \pm 0.7\%$  and  $88.4 \pm 1.4\%$  for parasites selected in diverse or  
252 homogeneous N2 populations, respectively. Therefore, in relation to control parasites, survival  
253 of N2 hosts declined by approximately a third when paired with parasites selected to kill N2  
254 (homogeneous N2: 33% decline; diverse: 27% decline). Parasites selected in diverse or  
255 homogeneous N2 populations did not differ from one another in their killing ability (coefficient  
256 = 0.198,  $z = 1.417$ ,  $p = 0.157$ ). Parasite lineages selected to kill hosts in populations that were  
257 homogeneous for LTM1 showed equivalent ability to kill N2 as control parasites ( $79.7 \pm 2.1\%$ ,  
258 coefficient = 0.068,  $z = 0.494$ ,  $p = 0.621$ ).

259         When paired with the ancestral parasite genotype, the mortality rate of LTM1 was 82.2%,  
260 identical to that of N2 hosts. This mortality rate was slightly lower than the mortality rate of  
261 LTM1 when paired with control parasite lineages after 20 experimental passages ( $83.8 \pm 0.5\%$   
262 SEM) (Table S2). Counter to our prediction, and in contrast to the results obtained for the N2  
263 host genotype, the mortality rate of LTM1 did not vary across selection treatments for  
264 experimentally evolved parasite lineages (Table 1B, Fig. 2B). The changes in virulence  
265 qualitatively matched those observed with N2: relative to control parasites, the mortality rate of  
266 LTM1 was slightly higher when paired with parasites selected in populations that were diverse or

267 homogeneous for LTM1 ( $85.8 \pm 0.6\%$ ,  $86.5 \pm 0.8\%$ ). We likewise observed no increase from  
268 control parasites in the mortality rate of LTM1 when paired with parasite lineages selected to kill  
269 hosts in populations that were homogeneous N2 ( $82.3 \pm 1.5\%$ ).

**Table 1: Experimental evolution treatment as a predictor of variation in parasite virulence on sympatric and novel host genotypes**

|                           | df | <i>D</i> | <i>p</i> |
|---------------------------|----|----------|----------|
| <i>On sympatric hosts</i> |    |          |          |
| A. N2                     | 3  | 22.93    | <0.001   |
| B. LTM1                   | 3  | 3.73     | 0.292    |
| <i>On novel host</i>      |    |          |          |
| C. JU1395                 | 3  | 30.01    | <0.001   |

Results of three separate generalized linear mixed models in which we fit parasite experimental evolution treatment (homogeneous N2, homogeneous LTM1, diverse, or control) as a predictor of the number of host individuals that survived parasite exposure. The three models correspond to three separate killing assays, one for each host genotype tested (A - N2, B - LTM1, and C - JU1395). We included parasite lineage (six independent lineages per experimental evolution treatment) as a random effect. We show the results of likelihood ratio (*D*) tests of models with and without treatment as a predictor.

270

271

272

273

274

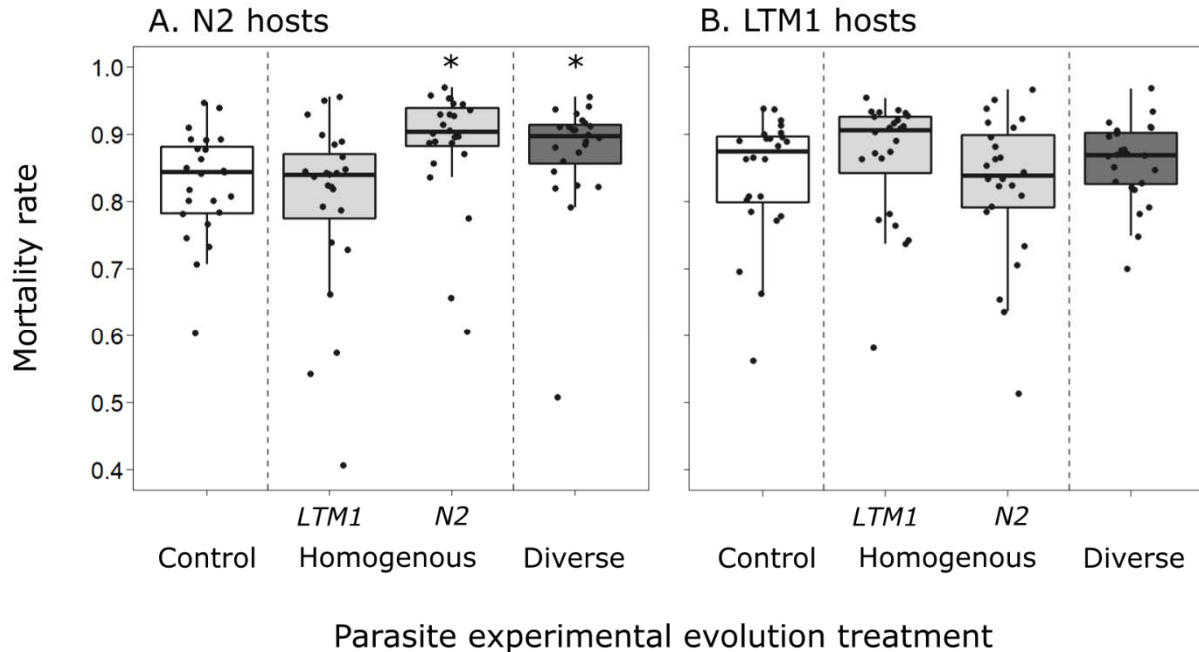

**Figure 2: Virulence of experimentally evolved parasites on their sympatric host genotypes.** The parasite *Serratia marcescens* was selected to kill *C. elegans* hosts in host populations that were homogeneous (100% LTM1; 100% N2) or diverse (50% LTM1: 50% N2). After 20 passages, we then tested evolved parasite lineages for their ability to kill N2 and LTM1 hosts. We compared the mortality rate of parasites against these hosts to that of control parasites, which were not selected to kill hosts and hence reflect baseline killing ability. (A) Parasites selected to kill hosts in populations that were diverse or homogeneous for N2 evolved an increased ability to kill N2 hosts, relative to control parasites or parasites selected to kill hosts in populations that were homogeneous for LTM1. (B) In contrast, parasites from different experimental evolution treatments did not differ in their ability to kill LTM1. Each box summarizes the results of 24 experimental replicates (4 replicates for each of 6 parasite lineages per treatment). Each point shows the mortality rate in a single experimental replicate, with  $494 \pm 26$  (N2) or  $498 \pm 25$  (LTM1) hosts tested per replicate.

275

### 276 *Adaptation to a novel host genotype*

277 We then evaluated the virulence of experimentally evolved parasites when paired with a  
278 novel host genotype, JU1395. We initially predicted 1) an increase or maintenance of virulence  
279 against the novel host genotype for parasites selected in diverse host populations and 2) a  
280 decrease in virulence against the novel host genotype for parasites selected in homogeneous host  
281 populations. Our results on adaptation to sympatric host genotypes subsequently suggested that

282 support for these predictions would be strongest in comparisons of parasites selected on diverse  
283 populations vs. populations homogeneous for N2.

284 The mortality rate of JU1395 was 95.6% when paired with the ancestral parasite  
285 genotype. This mortality rate was slightly higher than the mortality rate of JU1395 when paired  
286 with control parasite lineages after 20 experimental passages ( $93.6 \pm 0.3\%$  SEM) (Table S3).  
287 When paired with experimentally evolved parasites, the mortality rate of JU1395 varied with  
288 parasite selection treatment (Table 1C, Fig. 3).

289 We found support for our first prediction, that parasites selected in diverse populations  
290 would maintain killing ability against a novel host genotype. Parasite lineages selected to kill  
291 hosts in populations that were diverse showed an equivalent ability to kill JU1395 as control  
292 parasites ( $94.1 \pm 0.3\%$ ; coefficient = -0.12856,  $z = -0.836$ ,  $p = 0.403$ ).

293 We found partial support for our second prediction that parasites selected in  
294 homogeneous host populations would lose killing ability against a novel host. Parasite lineages  
295 selected to kill hosts in populations that were homogeneous for N2 showed reduced ability to kill  
296 JU1395 hosts relative to control parasites (coefficient = 0.632,  $z = 4.075$ ,  $p < 0.001$ ) and to  
297 parasites selected to kill hosts in diverse populations (coefficient = 0.761,  $z = 4.962$ ,  $p < 0.001$ ).  
298 Specifically, the mortality rate of JU1395 was  $86.1 \pm 1.8\%$  when paired with parasites selected to  
299 kill hosts in populations that were homogeneous N2. Therefore, in relation to control or diverse-  
300 selected parasites, survival of novel hosts was more than two-fold greater with parasites selected  
301 in homogeneous N2 populations (vs. control: 2.19-fold greater; vs. 50%: 2.35-fold greater). In  
302 contrast, the mortality rate of JU1395 was  $92.5 \pm 0.7\%$  when paired with parasite lineages  
303 selected to kill hosts in populations that were homogeneous LTM1. This did not differ  
304 significantly from mortality rates of JU1395 hosts when paired with control parasites (coefficient



305 = 0.093,  $z = 0.606$ ,  $p = 0.544$ ) or diverse-selected parasites (coefficient = 0.221,  $z = 1.442$ ,  $p =$   
306 0.149). While counter to our prediction, this latter result corresponds to our finding that parasites  
307 failed to evolve significantly increased virulence against LTM1 (Table 1B, Fig. 2B).

308 Consistent with our findings above, parasites selected in homogeneous N2 populations  
309 showed the greatest between-lineage variation in performance on the novel host genotype.  
310 Control parasites and diverse-selected parasites showed equivalent between-lineage variation in  
311 their ability to kill the novel host, both in terms of number of survivors (coefficients of variation:  
312 0.299, 95% CI [0.155,0.582] v. 0.312 [0.219,0.552], respectively) and mortality rate (0.020  
313 [0.010,0.042] v. 0.020 [0.014,0.035]) (Table S4). For parasites selected in populations that were  
314 homogeneous N2, between-lineage variation was substantially higher (number of survivors:  
315 0.780 [0.622,0.965]; mortality rate: 0.126 [0.092, 0.169]). This variation arose from the fact that  
316 virulence against JU1395 was very low for some lineages in this treatment (mortality rates:  $69.5$   
317  $\pm 4.3\%$ ,  $75.0 \pm 4.8\%$ ) and high for others ( $92.9 \pm 1.6\%$ ,  $93.1 \pm 2.5\%$ ,  $93.4 \pm 2.0\%$ ,  $92.6 \pm 1.8\%$ ).  
318 For parasites selected in populations that were homogeneous LTM1, between-lineage variation  
319 was somewhat elevated (number of survivors: 0.565 [0.413,0.779]; mortality rate: 0.046 [0.032,  
320 0.065]), though not to the same extent as observed for parasites selected in homogeneous N2  
321 populations.

322

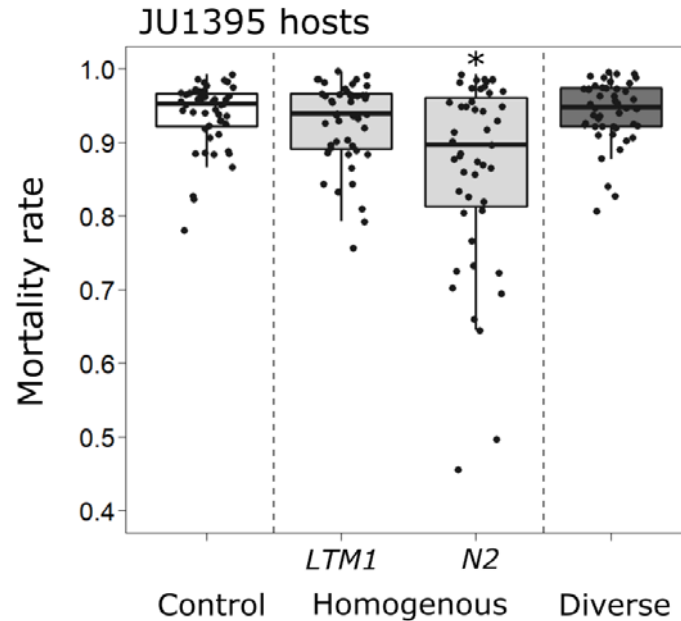

**Figure 3: Virulence of experimentally evolved parasites on a novel host genotype.** Here, we tested evolved parasite lineages for their ability to kill a novel host genotype, JU1395. Parasites selected to kill hosts in populations that were homogeneous for N2 (100% N2) lost their ability to kill the novel host (reduced mortality rate), consistent with specialization on the N2 genotype. In contrast, parasites selected to kill hosts in populations that were diverse (50% N2: 50% LTM1) maintained their ability to kill the novel host (equivalent mortality rate), consistent with the maintenance of generalism. Parasites selected to kill hosts in populations were homogeneous for LTM1 (100% LTM1) also showed no change in killing ability of the novel host, relative to control parasites. Each box summarizes the results of 48 experimental replicates (8 replicates for each of 6 parasite lineages per treatment). Each point shows the mortality rate in a single experimental replicate, with  $270 \pm 12$  hosts tested per replicate.

323

## 324 Discussion

325 We set out to test the hypothesis that parasite host range evolves to match the variance of the  
326 host environment. Specifically, we predicted that genetically diverse host populations select for  
327 parasites that can infect a broad range of host genotypes, while genetically homogeneous host  
328 populations select for specialist parasites. Prior studies have investigated the evolution of host  
329 range under temporal variation in the host population, predominantly in virus-cell culture  
330 systems. We complemented this prior body of work by testing spatial, rather than temporal,  
331 variation in host diversity, in a eukaryotic host-parasite system. Consistent with our hypothesis,  
332 selection in diverse host populations maintained a broad host range in parasite populations (Fig.

333 3). However, selection in homogeneous host populations led to the evolution of specialist  
334 parasites in only one of the two sympatric host genotypes (Fig. 2).

335         Selection in homogeneous and diverse host populations resulted in parasite populations  
336 with increased virulence against the host genotype N2 (Fig. 2A). In fact, parasites selected in  
337 diverse host populations increased in virulence to the same extent as parasites selected in  
338 homogeneous N2 populations, as indicated by the statistically indistinguishable mortality rate of  
339 hosts exposed to these different parasite populations. In the case of homogeneous N2-selected  
340 parasites, increased killing of N2 coincided with a contraction of host range, as indicated by a  
341 loss of killing against the novel host JU1395. In contrast, for diverse-selected parasites,  
342 increased killing of N2 was accomplished without a contraction of host range: diverse-selected  
343 parasite populations maintained genotypes with high killing ability and less between-lineage  
344 performance in a novel host environment (Fig. 3). Our results suggest that genetic diversity of  
345 the host population prevented the fixation of mutations that carry deleterious effects in alternate  
346 host environments due to antagonistic pleiotropy or relaxed selection. We do not know the  
347 extent of polymorphism in diverse-selected parasite lineages: they may be monomorphic  
348 generalists or polymorphic, with some genotypes specialized on N2. These findings more  
349 broadly suggest that parasite lineages from genetically diverse host populations will be more  
350 likely to emerge in novel host populations.

351         Selection in homogeneous and diverse host populations did not result in parasite  
352 populations with increased virulence against the host genotype LTM1 (Fig. 2B). This lack of  
353 adaptation corresponded to the maintenance of a broad host range: homogeneous LTM1-selected  
354 parasites showed no contraction of host range relative to control and diverse-selected parasites  
355 (Fig. 3). Our experimental evolution may have provided insufficient time for adaptation to

356 LTM1. Initially high rates of killing by ancestral parasites could have slowed fixation of  
357 beneficial mutations if these are rarer in the LTM1 host environment than the N2 host  
358 environment. Consistent with this hypothesis, changes in virulence against LTM1 qualitatively  
359 matched the predicted changes, with slightly increased virulence of diverse-selected and  
360 homogeneous LTM1-selected parasites relative to control and homogeneous N2-selected  
361 parasites (Fig. 2). Compared to what we observed with adaptation to N2, these changes were  
362 smaller in magnitude with more variation around the mean. Additional generations of selection  
363 may produce stronger differentiation between treatments. We conclude that intrinsic differences  
364 between these host genotypes altered the rate at which specialization evolved and thereby the  
365 dynamics of emergence probability on novel host genotypes.

366         Prior studies of host range have similarly found that host range evolves differently  
367 according to the host species encountered. Fellous et al. (2014) selected populations of the  
368 spider mite *Tetranychus urticae* for growth on different plant species. They found variation in  
369 host range according to the plant species: selection on rosebay produced mite populations with  
370 consistent performance across plant species, while selection on tomato produced mite  
371 populations with more variable performance. In Turner et al. (2010), adaptation to homogeneous  
372 lines of human and canine cells reduced viral performance on novel cell lines for the human-  
373 adapted viruses but not the canine-adapted viruses. They argue that performance in canine cell  
374 lines is broadly correlated with performance in other host environments, such that a  
375 homogeneous host environment can indirectly select for parasites with broad host range. Our  
376 results suggest that the same argument may apply to host range evolution at the level of host  
377 genotype.

378           Much of our knowledge of host range evolution at the level of host genotype comes from  
379 studies of coevolving bacteria-phage systems. These studies provide indirect support for the idea  
380 that host populations that maintain genetic diversity select for parasites that can infect a broad  
381 range of host genotypes: relative to bacteria or phage evolution alone, coevolution maintains  
382 more diversity within bacterial host populations and selects for phages with broader host ranges  
383 (Poullain et al. 2008; Hall et al. 2010). We prevented coevolution in our study by preventing  
384 evolution of our host lines. Prior experimental coevolution studies in this system find that  
385 coevolution can maintain diversity in host populations (Morran et al. 2011). Based upon our  
386 results here, we then predict that, on average, parasite lineages passaged with coevolving host  
387 populations will maintain broader host ranges than parasites serially passaged with host  
388 populations that are homogeneous in space and time. Broadly, our results point to the  
389 significance of the local host population, in terms of both the identity and diversity of host  
390 genotypes present, in determining a parasite population's potential to shift to new hosts.

## 391 **List of Works Cited**

- 392 Andersen, E. C., J. P. Gerke, J. A. Shapiro, J. R. Crissman, R. Ghosh, J. S. Bloom, M.-A. Félix, and L. Kruglyak.  
393 2012. Chromosome-scale selective sweeps shape *Caenorhabditis elegans* genomic diversity. *Nature Genet.*  
394 44:285.
- 395 Barrière, A. and M. A. Félix. 2005. High local genetic diversity and low outcrossing rate in *Caenorhabditis elegans*  
396 natural populations. *Current Biology* 15:1176-1184.
- 397 Bates, D., M. Maechler, B. Bolker, and S. Walker. 2015. Fitting linear mixed-effects models using lme4. *Journal of*  
398 *Statistical Software* 67:1-48.
- 399 Bedhomme, S., G. Lafforgue, and S. F. Elena. 2011. Multihost experimental evolution of a plant RNA virus reveals  
400 local adaptation and host-specific mutations. *Molecular Biology and Evolution* 29:1481-1492.
- 401 Bennett, A. F., R. E. Lenski, and J. E. Mittler. 1992. Evolutionary adaptation to temperature. I. Fitness responses of  
402 *Escherichia coli* to changes in its thermal environment. *Evolution* 46:16-30.
- 403 Carius, H. J., T. J. Little, and D. Ebert. 2001. Genetic variation in a host-parasite association: potential for  
404 coevolution and frequency-dependent selection. *Evolution* 55:1136-1145.
- 405 Coffey, L. L. and M. Vignuzzi. 2011. Host alternation of chikungunya virus increases fitness while restricting  
406 population diversity and adaptability to novel selective pressures. *Journal of Virology* 85:1025-1035.
- 407 Cunfer, B. 1984. Change of virulence of *Septoria nodorum* during passage through barley and wheat. *Annals of*  
408 *Applied Biology* 104:61-68.
- 409 Desdevises, Y., S. Morand, and P. Legendre. 2002. Evolution and determinants of host specificity in the genus  
410 *Lamellodiscus* (Monogenea). *Biological Journal of the Linnean Society* 77:431-443.
- 411 Ebert, D. 1998. Experimental evolution of parasites. *Science* 282:1432-1435.

- 412 Fellous, S., G. Angot, M. Orsucci, A. Migeon, P. Auger, I. Olivieri, and M. Navajas. 2014. Combining experimental  
413 evolution and field population assays to study the evolution of host range breadth. *Journal of Evolutionary*  
414 *Biology* 27:911-919.
- 415 Fry, J. D. 1990. Trade-offs in fitness on different hosts: evidence from a selection experiment with a phytophagous  
416 mite. *American Naturalist* 136:569-580.
- 417 Fry, J. D. 1996. The evolution of host specialization: are trade-offs overrated? *American Naturalist* 148:S84-S107.
- 418 Futuyma, D. J. and G. Moreno. 1988. The evolution of ecological specialization. *Annual Review of Ecology and*  
419 *Systematics* 19:207-233.
- 420 Hall, A. R., P. D. Scanlan, and A. Buckling. 2010. Bacteria-phage coevolution and the emergence of generalist  
421 pathogens. *American Naturalist* 177:44-53.
- 422 Jaenike, J. 1990. Host specialization in phytophagous insects. *Annual Review of Ecology and Systematics* 21:243-  
423 273.
- 424 Kassen, R. 2002. The experimental evolution of specialists, generalists, and the maintenance of diversity. *Journal of*  
425 *Evolutionary Biology* 15:173-190.
- 426 Krasnov, B. R., D. Mouillot, G. I. Shenbrot, I. S. Khokhlova, and R. Poulin. 2004. Geographical variation in host  
427 specificity of fleas (Siphonaptera) parasitic on small mammals: the influence of phylogeny and local  
428 environmental conditions. *Ecography* 27:787-797.
- 429 Levins, R. 1962. Theory of fitness in a heterogeneous environment. I. The fitness set and adaptive function.  
430 *American Naturalist* 96:361-373.
- 431 Lynch, M. and W. Gabriel. 1987. Environmental tolerance. *American Naturalist* 129:283-303.
- 432 Morran, L., O. Schmidt, I. Gelarden, R. Parrish II, and C. M. Lively. 2011. Running with the Red Queen: host-  
433 parasite coevolution selects for biparental sex. *Science* 333:216-218.
- 434 Morran, L. T., M. D. Parmenter, and P. C. Phillips. 2009. Mutation load and rapid adaptation favor outcrossing over  
435 self-fertilization. *Nature* 462:350-352.
- 436 Novella, I. S., C. L. Hershey, C. Escarmis, E. Domingo, and J. J. Holland. 1999. Lack of evolutionary stasis during  
437 alternating replication of an arbovirus in insect and mammalian cells. *Journal of Molecular Biology*  
438 287:459-465.
- 439 Pianka, E. R. 1966. Latitudinal gradients in species diversity: a review of concepts. *American Naturalist* 100:33-46.
- 440 Poulin, R. and D. Mouillot. 2003. Parasite specialization from a phylogenetic perspective: a new index of host  
441 specificity. *Parasitology* 126:473-480.
- 442 Poullain, V., S. Gandon, M. A. Brockhurst, A. Buckling, and M. E. Hochberg. 2008. The evolution of specificity in  
443 evolving and coevolving antagonistic interactions between a bacteria its phage. *Evolution* 62:1-11.
- 444 R Core Team. 2013. R: a language and environment for statistical computing. R Foundation for Statistical  
445 Computing Vienna, Austria:<http://www.R-project.org>.
- 446 Rausher, M. D. 1984. Tradeoffs in performance on different hosts: evidence from within- and between-site  
447 variation in the beetle *Deloyala guttata*. *Evolution* 38:582-595.
- 448 Reboud, X. and G. Bell. 1997. Experimental evolution in *Chlamydomonas*. III. Evolution of specialist and generalist  
449 types in environments that vary in space and time. *Heredity* 78:507.
- 450 Ross, L., N. B. Hardy, A. Okusu, and B. B. Normark. 2013. Large population size predicts the distribution of  
451 asexuality in scale insects. *Evolution* 67:196-206.
- 452 Schulenburg, H. and J. J. Ewbank. 2004. Diversity and specificity in the interaction between *Caenorhabditis elegans*  
453 and the pathogen *Serratia marcescens*. *BMC Evolutionary Biology* 4:49.
- 454 Slowinski, S. P., L. T. Morran, R. C. Parrish II, E. R. Cui, A. Bhattacharya, C. M. Lively, and P. C. Phillips. 2016.  
455 Coevolutionary interactions with parasites constrain the spread of self-fertilization into outcrossing host  
456 populations. *Evolution* 70:2632-2639.
- 457 Thrall, P. H., J. J. Burdon, and A. Young. 2001. Variation in resistance and virulence among demes of a plant host-  
458 pathogen metapopulation. *Journal of Ecology* 89:736-748.
- 459 Turner, P. E., N. M. Morales, B. W. Alto, and S. K. Remold. 2010. Role of evolved host breadth in the initial  
460 emergence of an RNA virus. *Evolution* 64:3273-3286.
- 461 Venables, W. N. and B. D. Ripley. 2002. *Modern Applied Statistics with S*. Springer, New York City, NY.
- 462 Via, S. 1990. Ecological genetics and host adaptation in herbivorous insects: the experimental study of evolution in  
463 natural and agricultural systems. *Annual Review of Entomology* 35:421-446.
- 464 Via, S. and R. Lande. 1985. Genotype-environment interaction and the evolution of phenotypic plasticity.  
465 *Evolution* 39:505-522.
- 466 Weaver, S. C., A. C. Brault, W. Kang, and J. J. Holland. 1999. Genetic and fitness changes accompanying  
467 adaptation of an arbovirus to vertebrate and invertebrate cells. *Journal of Virology* 73:4316-4326.

468 Whitlock, M. C. 1996. The red queen beats the jack-of-all-trades: the limitations on the evolution of phenotypic  
469 plasticity and niche breadth. *American Naturalist* 148:S65-S77.

470

471

472

473

474

475

476

477

478

479

480

481

482

483

484

485

486

487

488

489

490

491
